# Supplementary material
Source: Research Square preprint supplement (doi:10.21203/rs.3.rs-8851681/v1)
Supplement: Supplementary file 1 [file 797c0accdc3754e477558fe4.docx]

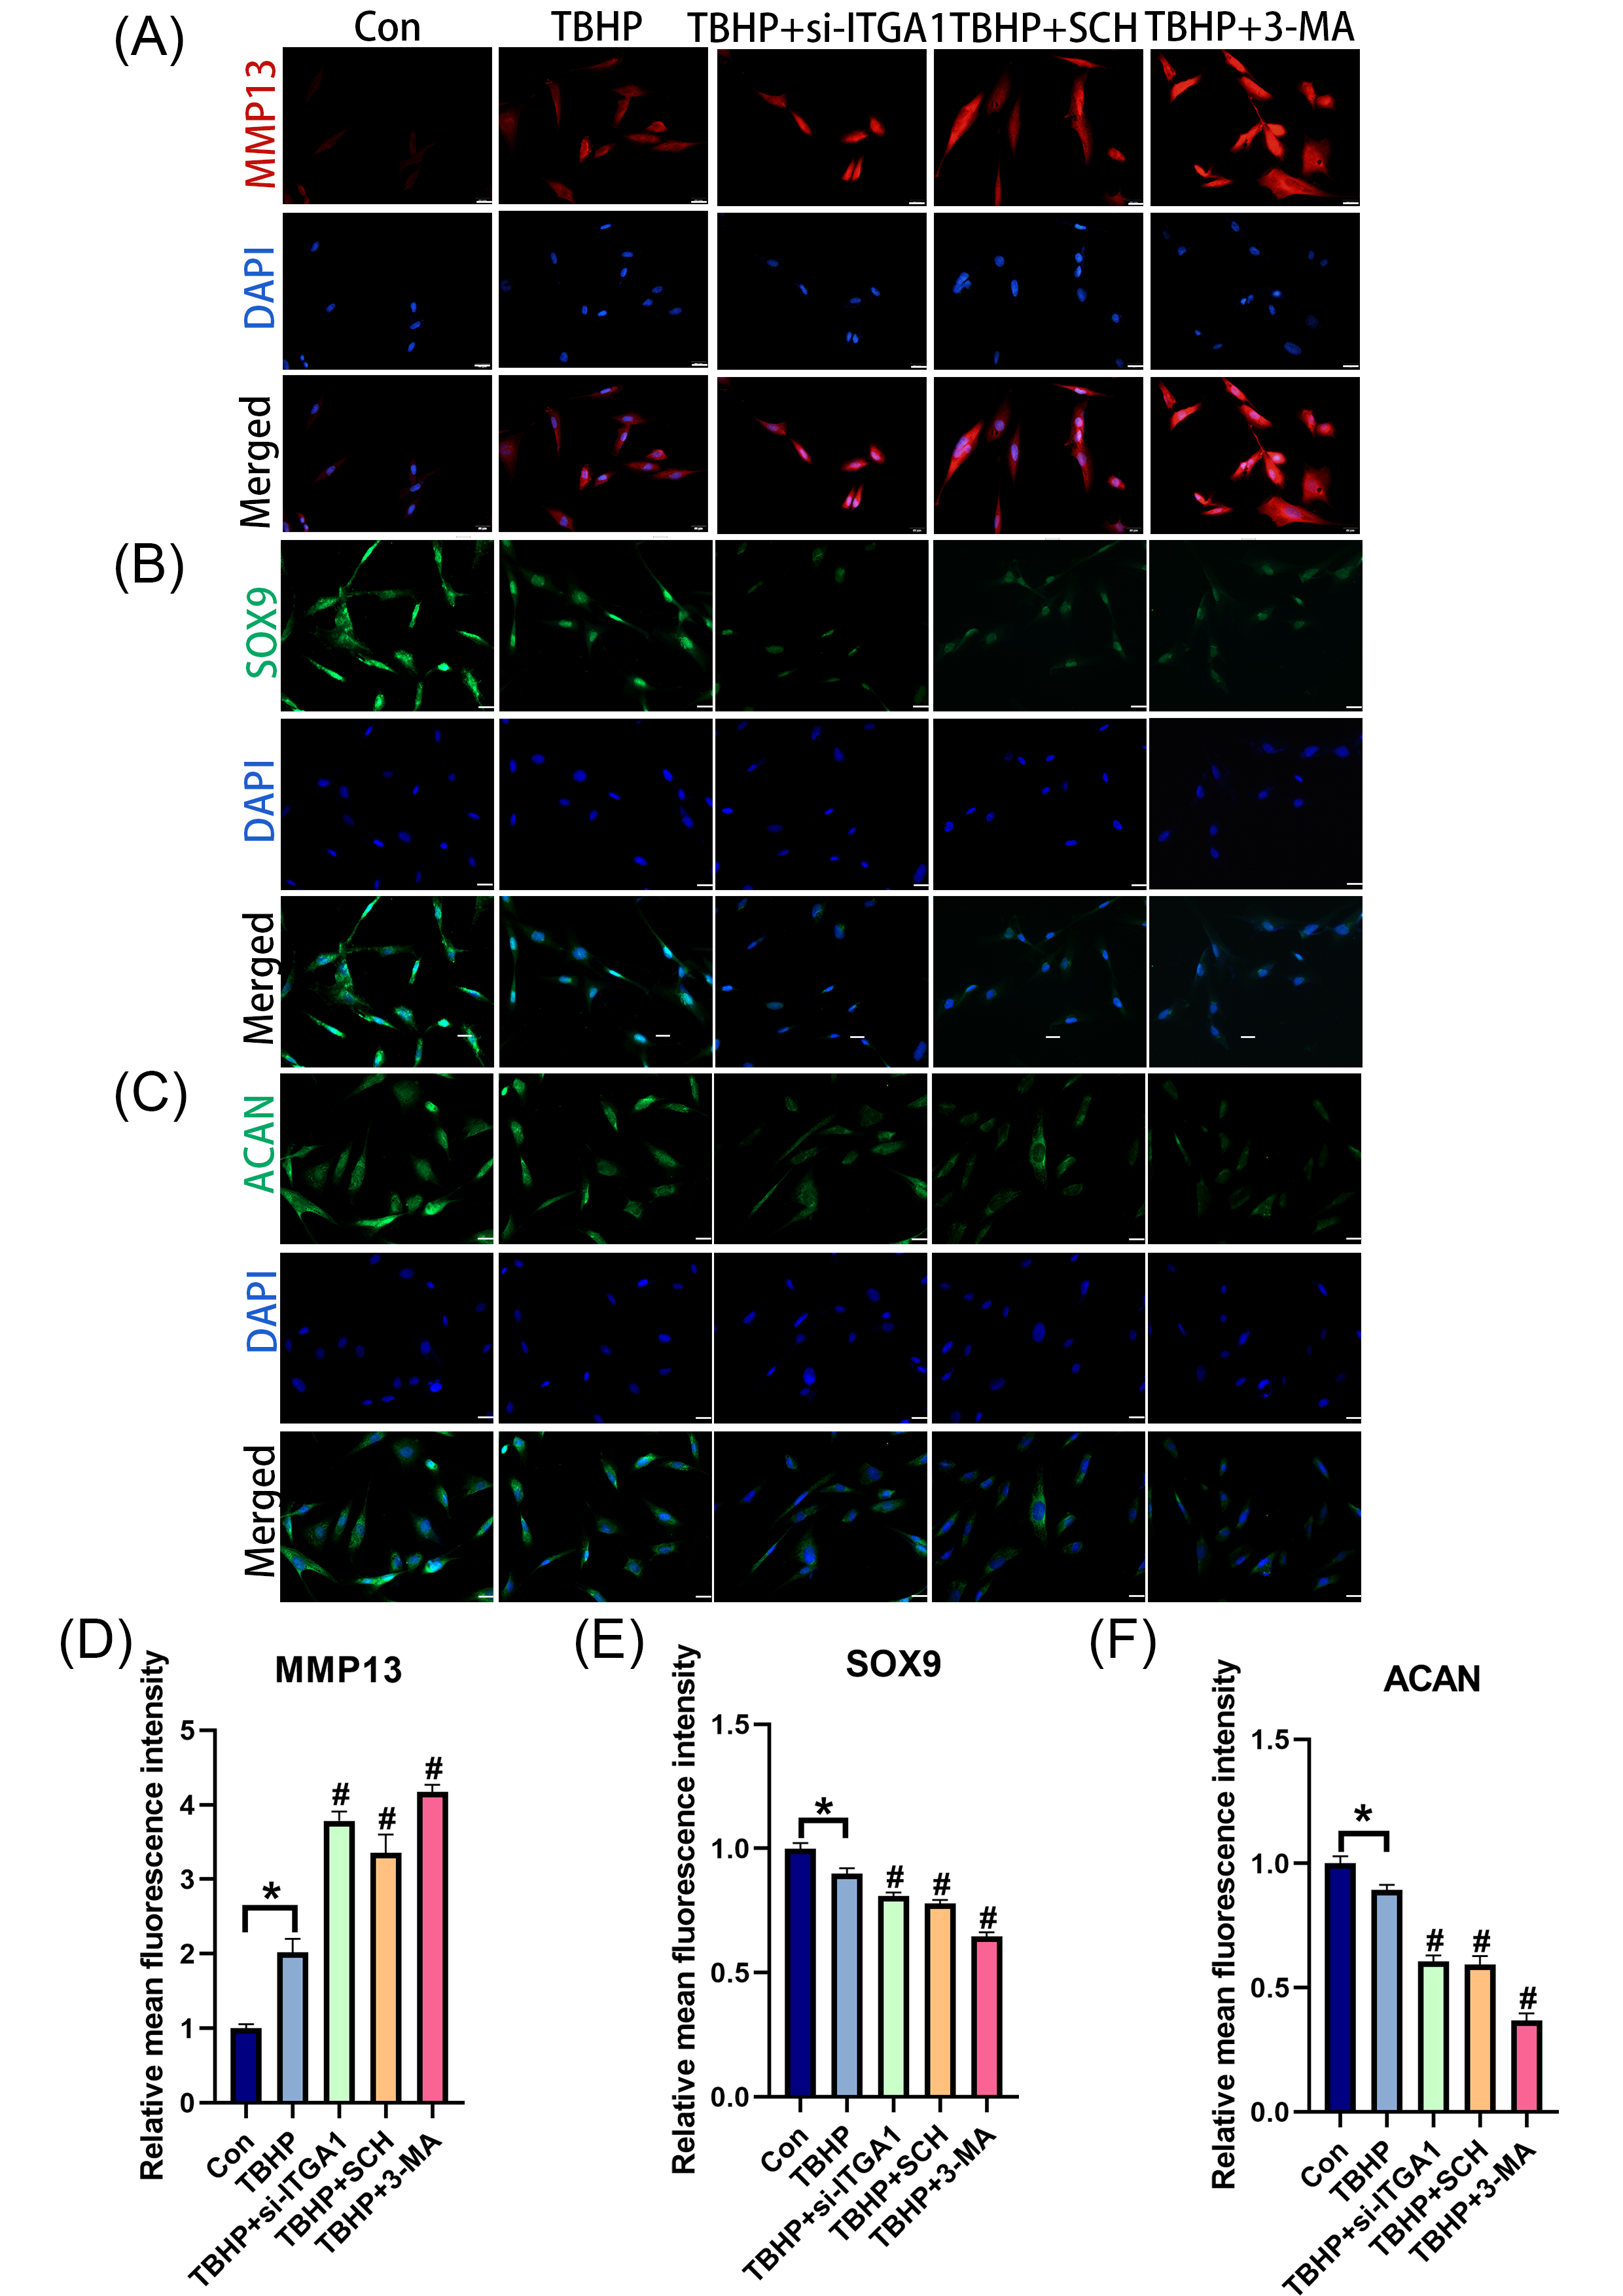


**Supplementary Figure 1.** **PMSC inhibits extracellular matrix degradation in nucleus pulposus cells.** NP cells were treated with culture medium (DF12+10%FBS, Con group), or TBHP alone (100μM, TBHP group), or si-ITGA1 and TBHP (TBHP+si-ITGA1 group), or TBHP and SCH772984 (TBHP+SCH group)or TBHP and 3-MA (TBHP+3-MA group). **(A)** Immunofluorescence of MMP13 protein in the NPCs, and the relative fluorescence intensity in each group was calculated in **(D).**  **(B)** Immunofluorescence of SOX9 protein in the NPCs, and the relative fluorescence intensity in each group was calculated in **(E). (C)** Immunofluorescence of ACAN protein in the NPCs, and the relative fluorescence intensity in each group was calculated in **(F).** Scale bar = 20μm.Results are presented as the means ± SD of three independent experiments (*p < 0.05, #p < 0.05; * vs. Con group, # vs. TBHP group).
